# Supplementary material
Source: PubMed Central journal article supplement (PMC9888002)
Supplement: NIHMS1862008-supplement-SI.pdf [file NIHMS1862008-supplement-SI.pdf]

## Supplementary information

---

# Preparation of selective organ-targeting (SORT) lipid nanoparticles (LNPs) using multiple technical methods for tissue-specific mRNA delivery

---

In the format provided by the authors and unedited

# Supplementary Information

for

## **Preparation of selective organ targeting (SORT) lipid nanoparticles (LNPs) using multiple technical methods for tissue-specific mRNA delivery**

Xu Wang<sup>1</sup>, Shuai Liu<sup>1</sup>, Yehui Sun<sup>1</sup>, Xueliang Yu<sup>1</sup>, Sang M. Lee<sup>1</sup>, Qiang Cheng<sup>1</sup>, Tuo Wei<sup>1</sup>, Junyu Gong<sup>1</sup>, Joshua Robinson<sup>1</sup>, Di Zhang<sup>1</sup>, Xizhen Lian<sup>1</sup>, Pratima Basak<sup>1</sup>, and Daniel J. Siegwart<sup>1,\*</sup>

*<sup>1</sup>Department of Biochemistry, Simmons Comprehensive Cancer Center, The University of Texas Southwestern Medical Center, Dallas, TX 75390, USA.*

\*To whom correspondence should be addressed. E-mail: [daniel.siegwart@utsouthwestern.edu](mailto:daniel.siegwart@utsouthwestern.edu)

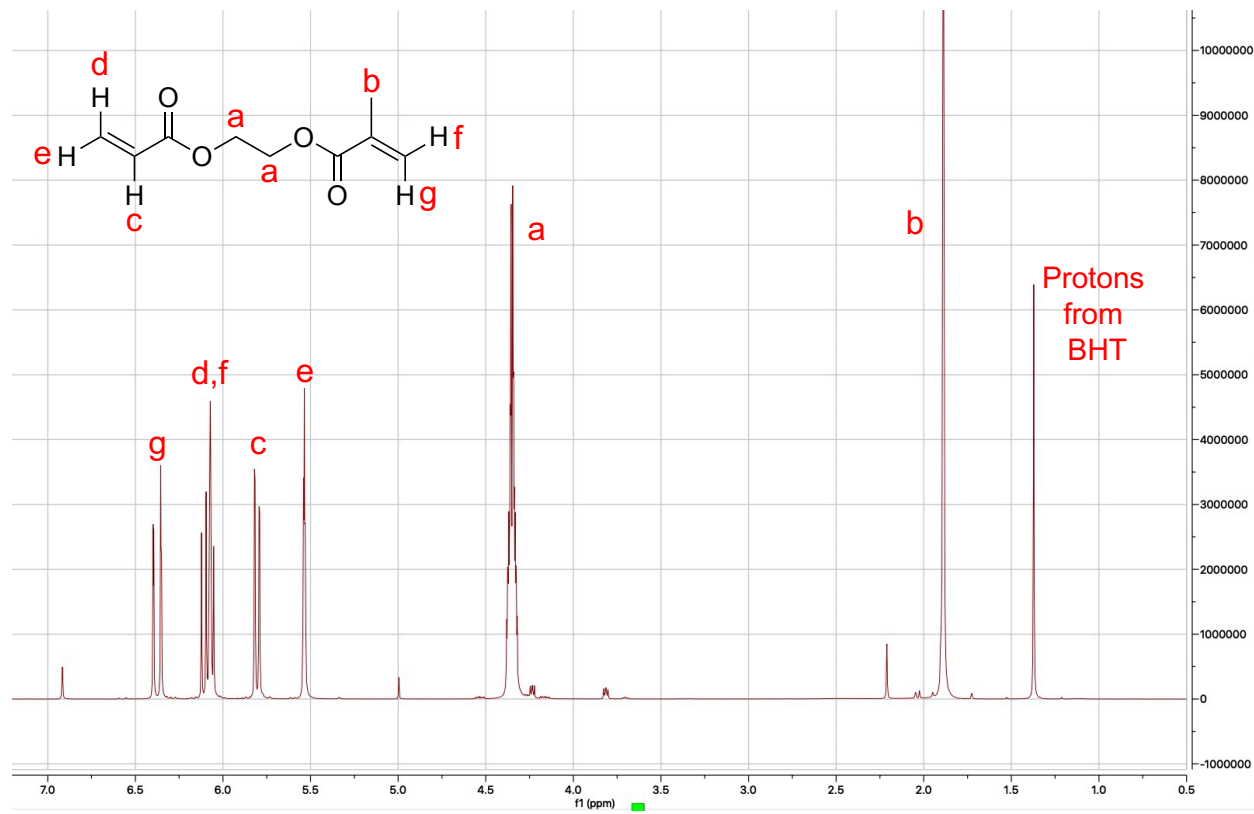

**Supplementary Fig. 1** <sup>1</sup>H NMR spectrum of AEMA in CDCl<sub>3</sub>.

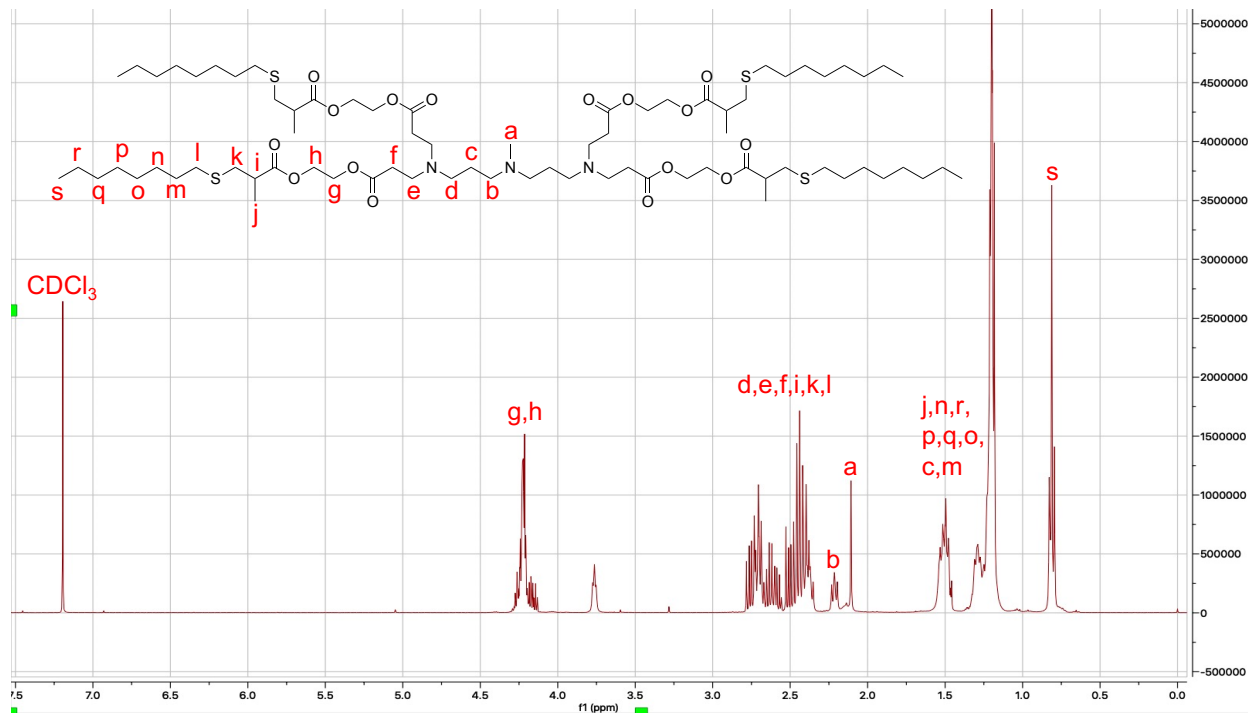

**Supplementary Fig. 2** <sup>1</sup>H NMR spectrum of 4A3-SC8 in CDCl<sub>3</sub>.

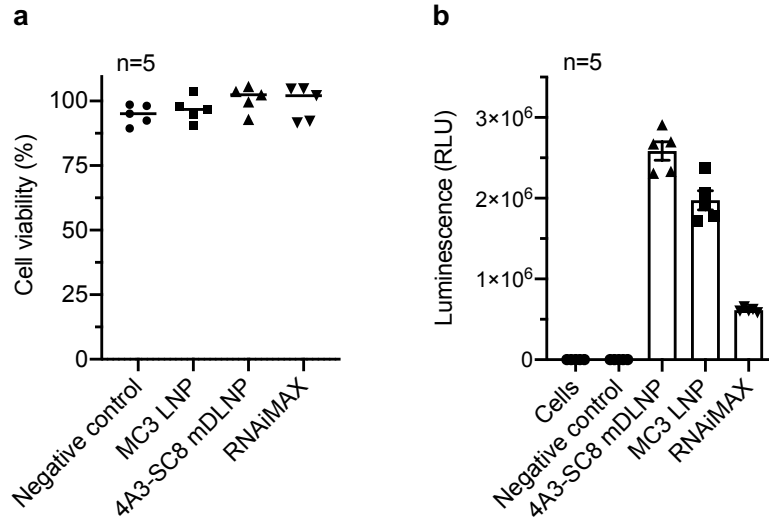

**Supplementary Fig. 3** *In vitro* evaluation of mRNA delivery to IGROV-1 cells. **a**, cell viability and **b**, *in vitro* luciferase expression following treatment of IGROV-1 cells with 4A3-SC8 mDLNP and MC3 LNPs prepared by the pipette mixing method (25 ng Luc-mRNA per well), measured by ONE-Glo + Tox luciferase reporter and cell viability assay. Data are presented as mean  $\pm$  s.e.m. (n =5 biologically independent samples).

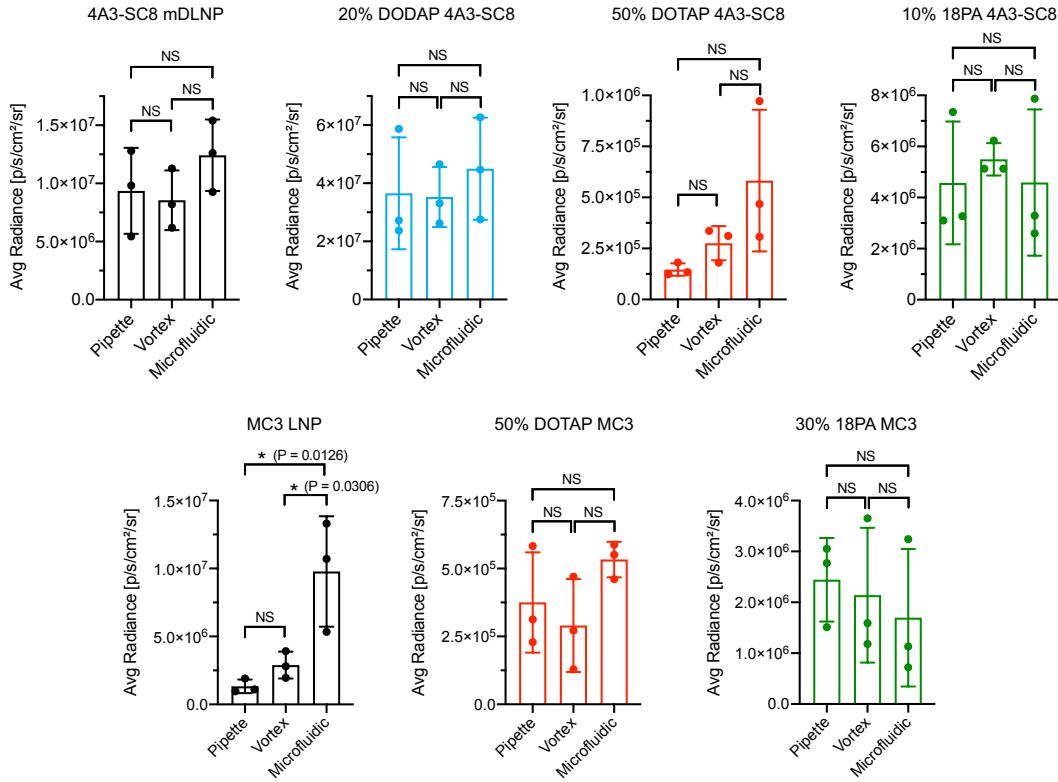

**Supplementary Fig. 4 Statistical analysis of data in Figs. 4d-g and 5d-f.** Data are presented as means  $\pm$  s.e.m. and statistical significance was calculated using one-way ANOVA with Tukey's multiple comparisons testing ( $****P < 0.0001$ ,  $***P < 0.001$ ,  $**P < 0.01$ ,  $*P < 0.05$ , NS:  $P > 0.05$ , no significant difference).
